# Supplementary material for: Pixelated Micropolarizer Array Based on Carbon Nanotube Films
Source: MDPI journal article supplement (doi:10.3390/nano13030391), 2023-01-18
Supplement: s1 [file s1]

## S1. The general Stokes parameters expression

For a quasi-monochromatic light propagating in the  $z$  direction, the electric-field vector can be decomposed into  $x$  and  $y$  components, which can be written as:

$$\begin{aligned} E_x &= a_x \exp(2\pi\nu t - \varphi_x) \\ E_y &= a_y \exp(2\pi\nu t - \varphi_y) \end{aligned} \quad (1)$$

where  $a_x$  and  $a_y$  are the instantaneous electrical-field amplitudes in the  $x$  and the  $y$  directions and the corresponding phases are  $\varphi_x$  and  $\varphi_y$ . These quantities can not be detected directly, therefore, four Stokes parameters were introduced to describe the polarization state:

$$\begin{aligned} S_0 &= \langle a_x^2 \rangle + \langle a_y^2 \rangle \\ S_1 &= \langle a_x^2 \rangle - \langle a_y^2 \rangle \\ S_2 &= 2\langle a_x a_y \cos(\varphi_y - \varphi_x) \rangle \\ S_3 &= 2\langle a_x a_y \sin(\varphi_y - \varphi_x) \rangle \end{aligned} \quad (2)$$

Where  $\langle \rangle$  means time average as all these quantities are time-varying.  $S_3$  represents the circularly

polarized component that could be negligible for general target recognition in nature and  $(\varphi_y - \varphi_x)$

can be regarded as 0. Take a more general case into consideration: the intensity of light passing through the polarizer with a direction of  $\theta$  respect to the  $x$ -axis can be described as follows:

$$I(\theta, 0) = \langle a_x^2 \rangle \cos^2 \theta + \langle a_y^2 \rangle \sin^2 \theta + 2\langle a_x a_y \rangle \sin \theta \cos \theta \quad (3)$$

The Stokes parameters in Eq. (2) can be transferred as follows:

$$\begin{aligned} S_0 &= \langle a_x^2 \rangle + \langle a_y^2 \rangle = \varepsilon I_t \\ S_1 &= \langle a_x^2 \rangle - \langle a_y^2 \rangle = 2I(0^\circ, 0) - \varepsilon I_t \\ S_2 &= 2\langle a_x a_y \cos(\varphi_y - \varphi_x) \rangle \\ &= \frac{I(\theta, 0) - (\langle a_x^2 \rangle \cos^2 \theta + \langle a_y^2 \rangle \sin^2 \theta)}{\sin \theta \cos \theta} \\ &= \frac{I(\theta, 0) - [I(0^\circ, 0) \cos^2 \theta + (\varepsilon I_t - I(0^\circ, 0)) \sin^2 \theta]}{\sin \theta \cos \theta} \\ S_2 &= \frac{2[I(\theta, 0) - I(0^\circ, 0) \cos 2\theta - \varepsilon I_t \sin^2 \theta]}{\sin 2\theta} \end{aligned} \quad (4)$$

A layer of attenuation film should be deposited on the transparent region to match the intensity in each section and avoid saturation in CCD. In that case,  $I_t$  in  $S_0$  should be corrected with a coefficient  $\varepsilon$ , which can be calibrated.

## S2. Detailed information on MPA fabrication in each step.

In the process of fabricating the MPA, some microelectronics equipment is applied and the corresponding recipes are set. For the reproduction of the fabrication method, details are given below:

Step 3: Photoresist AZ5214 is applied and the coating speed is over 3000 rpm. Then, bake at 100 °C for one minute. The exposure time of the mask aligner (Karl Suss, MABA6) is 2 s, and the light intensity is 19.5 MW/cm<sup>2</sup>@365 nm. Before development, the wafer should be baked at 120 °C for 1 min and subjected to 16 seconds of floodlight exposure.

Step 4: The etching parameters of SiO<sub>2</sub> via RIE are listed in the table below:

**Table S1.** The etching parameters of SiO<sub>2</sub> via RIE

| CHF <sub>3</sub> | Ar      | Pressure | Power | Etching rate |
|------------------|---------|----------|-------|--------------|
| 25 sccm          | 25 sccm | 30 mTorr | 200 W | 30 nm/min    |

Step 5: The etching parameters of CNT film via ICP are listed in the table below:

**Table S2.** The etching parameters of CNT film via ICP

| O <sub>2</sub> | Pressure | Temperature | ICP power | RF power | Etching rate |
|----------------|----------|-------------|-----------|----------|--------------|
| 1500 sccm      | 50 mTorr | 50 °C       | 1500 W    | 100 W    | 1200 nm/min  |

Step 6: The deposition parameters of SiO<sub>2</sub> via PECVD are listed in the table below:

**Table S3.** The deposition parameters of SiO<sub>2</sub> via PECVD

| SiH <sub>4</sub> /N <sub>2</sub> | N <sub>2</sub> O | Pressure  | Power | Temperature |
|----------------------------------|------------------|-----------|-------|-------------|
| 150 sccm                         | 715 sccm         | 850 mTorr | 200 W | 300 °C      |
